# Supplementary material for: A systematic review of help-seeking interventions for depression, anxiety and general psychological distress
Source: Springer Nature journal article supplement (doi:10.1186/1471-244x-12-81), 2012-07-16
Supplement: 12888_2012_1015_MOESM4_ESM.pdf [file 12888_2012_1015_MOESM4_ESM.pdf]

Records identified through database searching  
(*n* = 2503)

Additional records identified through hand searching  
(*n* = 14)

Records after duplicates removed  
(*n* = 2232)

Records screened  
(*n* = 2232)

Records excluded  
(*n* = 2180)

Full-text articles assessed for eligibility  
(*n* = 53)

Excluded (*n* = 47)  
25 = Not randomised controlled trials  
8 = Targeting other problems/disorders  
5 = No extractable data  
5 = Not an intervention  
4 = Did not aim to increase help-seeking

Studies included in qualitative synthesis  
(*n* = 6)
